# Supplementary material for: Simvastatin as a neuroprotective treatment for Parkinson’s disease (PD STAT): protocol for a double-blind, randomised, placebo-controlled futility study
Source: PubMed Central journal article supplement — BMJ Open. 2019 Oct 7;9(10):e029740. doi: 10.1136/bmjopen-2019-029740 (PMC6797358; doi:10.1136/bmjopen-2019-029740), 2019-10-07
Supplement: bmjopen-2019-029740supp001.pdf [file bmjopen-2019-029740supp001.pdf]

**Appendix A: Recruiting Sites**

1. Derriford Hospital, Plymouth
2. Royal Cornwall Hospital, Truro
3. Royal Devon and Exeter Hospital
4. Musgrove Park Hospital, Taunton
5. Yeovil District Hospital
6. Christchurch Hospital, Bournemouth
7. Royal United Hospital, Bath
8. St Peter's Hospital, Chertsey
9. Charing Cross Hospital, London
10. Royal Free Hospital, London
11. Queen's Hospital, Romford
12. John Radcliffe Hospital, Oxford
13. Luton and Dunstable Hospital
14. Addenbrookes Hospital, Cambridge
15. Salford Royal Hospital
16. Fairfield General Hospital, Bury
17. Royal Preston Hospital
18. Leeds General Infirmary
19. Clinical Ageing Research Unit, Newcastle
20. Kings College Hospital, London
21. Royal Hallamshire Hospital, Sheffield
22. Norfolk and Norwich University Hospital
23. Rotherham General Hospital
